# Supplementary material for: Decisional Conflict About Kidney Failure Treatment Modalities Among Adults With Advanced CKD
Source: PubMed Central journal article supplement — Kidney Med. 2022 Aug 4;4(9):100521. doi: 10.1016/j.xkme.2022.100521 (PMC9449857; doi:10.1016/j.xkme.2022.100521), 2022-08-04
Supplement: mmc1.pdf [file mmc1.pdf]

**Table S1. Comparison of characteristics between PREPARE NOW participants with and without complete data on the SURE screening test for decisional conflict**

| Participant Characteristic | Response                              | Total<br><i>n</i> = 449 | Complete data<br><i>n</i> = 427 (95%) | Incomplete data<br><i>n</i> = 22 (5%) | <i>p</i> |
|----------------------------|---------------------------------------|-------------------------|---------------------------------------|---------------------------------------|----------|
| <b>Sociodemographic</b>    |                                       |                         |                                       |                                       |          |
| Age                        | Mean (SD)                             | 71.8 (12.3)             | 71.6 (12.3)                           | 75.6 (12.6)                           | .07      |
| Sex                        | Female                                | 264 (59%)               | 254 (60%)                             | 10 (46%)                              | .19      |
| Race                       | Non-Hispanic White                    | 431 (96%)               | 412 (97%)                             | 19 (86%)                              | .03      |
| Marital status             | Married/Living with partner           | 244 (54%)               | 235 (55%)                             | 9 (41%)                               | .24      |
|                            | Not married/Living with partner       | 204 (45%)               | 191 (45%)                             | 13 (59%)                              |          |
| Education                  | Less than high school                 | 63 (14%)                | 58 (14%)                              | 5 (23%)                               | .03      |
|                            | High school graduate/GED/Some college | 294 (66%)               | 283 (66%)                             | 11 (50%)                              |          |
|                            | College graduate or more              | 86 (19%)                | 82 (19%)                              | 4 (18%)                               |          |
| Employment status          | Employed/Looking for work             | 78 (17%)                | 78 (18%)                              | 0 (0.0%)                              | <.001    |
|                            | Unemployed                            | 4 (1%)                  | 4 (1%)                                | 0 (0.0%)                              |          |
|                            | Retired                               | 285 (64%)               | 52 (12%)                              | 0 (0.0%)                              |          |
|                            | Retired due to disability             | 52 (12%)                | 283 (66%)                             | 2 (9%)                                |          |
| Annual household income    | Less than \$30,000                    | 137 (31%)               | 137 (32%)                             | 0 (0%)                                | <.001    |
|                            | \$30,000 to \$59,999                  | 109 (24%)               | 108 (25%)                             | 1 (5%)                                |          |
|                            | \$60,000 and above                    | 77 (17%)                | 76 (18%)                              | 1 (5%)                                |          |
| Insurance                  | Commercial                            | 93 (21%)                | 89 (21%)                              | 4 (18%)                               | .90      |
|                            | Government/Other                      | 4 (1%)                  | 4 (1%)                                | 0 (0%)                                |          |
|                            | Medicaid                              | 36 (8%)                 | 34 (8%)                               | 2 (9%)                                |          |
|                            | Medicare                              | 316 (70%)               | 300 (70%)                             | 16 (73%)                              |          |
| <b>Physical health</b>     |                                       |                         |                                       |                                       |          |
| Charlson Comorbidity Index | Median (IQR)                          | 5.0 (3.0, 7.0)          | 5.0 (3.0, 7.0)                        | 4.0 (3.0, 5.0)                        | .40      |
| CKD stage                  | Stages 2/3a/3b (30 - 60)              | 279 (62%)               | 263 (62%)                             | 16 (73%)                              | .47      |

|                          |                   |                |                |                |     |
|--------------------------|-------------------|----------------|----------------|----------------|-----|
|                          | Stage 4 (15 – 29) | 156 (35%)      | 150 (35%)      | 6 (27%)        |     |
|                          | Stage 5 (< 15)    | 14 (3%)        | 14 (3%)        | 0 (0%)         |     |
| <b>Nephrology care</b>   |                   |                |                |                |     |
| Years in nephrology care | Median (IQR)      | 3.8 (1.9, 6.4) | 3.8 (1.9, 6.5) | 3.9 (1.9, 5.5) | .70 |

*Note.* SURE = Sure of myself, Understand information, Risk-benefit ratio, Encouragement; eGFR = estimated glomerular filtration rate. Frequencies or medians (IQR) are shown. Participant differences in the presence of decisional conflict were measured using Mann-Whitney tests for continuous variables and chi-squared or Fisher’s exact tests for categorical variables. Frequencies may not total 100% due to missing data. Participants with complete decisional conflict data answered all four items on the SURE screening test with “yes,” “no,” or “don’t know” responses. Participants without decisional conflict data had a response of “refused” or were missing one or more items on the SURE screening test.

**Table S2. Characteristics of the highest-risk subgroup overall and according to SURE screening test results for decisional conflict about kidney failure treatment modalities**

| Characteristic             | Response                              | Total<br><i>n</i> = 171 | Decisional<br>Conflict<br>(score $\leq$ 3)<br><i>n</i> = 124, 73% | No Decisional<br>Conflict<br>(perfect score)<br><i>n</i> = 47, 27% | <i>p</i> |
|----------------------------|---------------------------------------|-------------------------|-------------------------------------------------------------------|--------------------------------------------------------------------|----------|
| <b>Sociodemographic</b>    |                                       |                         |                                                                   |                                                                    |          |
| Age                        | Mean (SD)                             | 70.6 (13.6)             | 72.1 (12.7)                                                       | 66.9 (15.2)                                                        | .05      |
| Sex                        | Female                                | 108 (63%)               | 80 (65%)                                                          | 28 (60%)                                                           | .55      |
| Race                       | Non-Hispanic White                    | 165 (97%)               | 120 (97%)                                                         | 45 (96%)                                                           | .74      |
| Marital status             | Married/living with partner           | 87 (51%)                | 65 (52%)                                                          | 22 (47%)                                                           | .51      |
|                            | Not married/living with partner       | 84 (49%)                | 59 (48%)                                                          | 25 (53%)                                                           |          |
| Education                  | Less than high school                 | 27 (16%)                | 21 (17%)                                                          | 6 (13%)                                                            | .63      |
|                            | High school graduate/GED/Some college | 110 (64%)               | 77 (62%)                                                          | 33 (70%)                                                           |          |
|                            | College graduate or more              | 32 (19%)                | 25 (20%)                                                          | 7 (15%)                                                            |          |
| Employment status          | Employed/Looking for work             | 34 (20%)                | 21 (17%)                                                          | 13 (28%)                                                           | .35      |
|                            | Unemployed                            | 3 (2%)                  | 3 (2%)                                                            | 0 (0%)                                                             |          |
|                            | Retired                               | 112 (66%)               | 85 (69%)                                                          | 27 (57%)                                                           |          |
|                            | Retired due to disability             | 17 (10%)                | 11 (9%)                                                           | 6 (13%)                                                            |          |
| Insurance                  | Commercial                            | 35 (20%)                | 23 (19%)                                                          | 12 (26%)                                                           | .01      |
|                            | Government/Other                      | 3 (2%)                  | 1 (1%)                                                            | 2 (4%)                                                             |          |
|                            | Medicaid                              | 12 (7%)                 | 5 (4%)                                                            | 7 (15%)                                                            |          |
|                            | Medicare                              | 121 (71%)               | 95 (76%)                                                          | 26 (55%)                                                           |          |
| Annual household income    | Less than \$30,000                    | 57 (33%)                | 42 (34%)                                                          | 15 (32%)                                                           | .99      |
|                            | \$30,000 to \$59,999                  | 38 (22%)                | 27 (22%)                                                          | 11 (23%)                                                           |          |
|                            | \$60,000 and above                    | 31 (18%)                | 22 (18%)                                                          | 9 (19%)                                                            |          |
| Health literacy            | Inadequate/Marginal                   | 58 (34%)                | 42 (34%)                                                          | 16 (34%)                                                           | .98      |
|                            | Adequate                              | 113 (66%)               | 82 (66%)                                                          | 31 (66%)                                                           |          |
| <b>Physical health</b>     |                                       |                         |                                                                   |                                                                    |          |
| Charlson Comorbidity Index | Median (IQR)                          | 5.0 (3.0, 7.0)          | 5.0 (3.0, 7.0)                                                    | 5.0 (3.0, 7.0)                                                     | .75      |

|                                                                       |                               |                     |                     |                     |       |
|-----------------------------------------------------------------------|-------------------------------|---------------------|---------------------|---------------------|-------|
| CKD stage                                                             | Stage 3a/3b (eGFR 30-45)      | 7 (4%)              | 6 (5%)              | 1 (2%)              | .31   |
|                                                                       | Stage 4 (eGFR 15-29)          | 150 (88%)           | 110 (89%)           | 40 (85%)            |       |
|                                                                       | Stage 5 (eGFR < 15)           | 14 (8%)             | 8 (6%)              | 6 (13%)             |       |
| KFRE                                                                  | Not High Risk                 | 104 (61%)           | 81 (65%)            | 23 (49%)            | .05   |
|                                                                       | High Risk                     | 67 (39%)            | 43 (35%)            | 24 (51%)            |       |
| Albumin Creatinine Ratio                                              | Median (IQR)                  | 159.4 (68.3, 643.3) | 136.8 (68.3, 495.7) | 234.5 (81.3, 731.8) | .21   |
| <b>CKD-specific care and knowledge</b>                                |                               |                     |                     |                     |       |
| Years in nephrology care                                              | Median (IQR)                  | 4.5 (2.2, 7.3)      | 4.0 (1.9, 6.8)      | 5.1 (3.0, 8.2)      | .04   |
| Patient-centeredness                                                  | Mean (SD)                     | 3.57 (.58)          | 3.50 (.63)          | 3.75 (.38)          | .02   |
| Kidney doctor has recommended specific treatment option               | Yes                           | 34 (20%)            | 19 (15%)            | 15 (32%)            | .005  |
|                                                                       | No                            | 58 (34%)            | 50 (40%)            | 8 (17%)             |       |
| Satisfaction with patient-kidney team discussion of treatment options | Completely                    | 46 (27%)            | 24 (19%)            | 22 (47%)            | .009  |
|                                                                       | Mostly                        | 18 (11%)            | 14 (11%)            | 4 (9%)              |       |
|                                                                       | Not at all/A little           | 13 (8%)             | 11 (9%)             | 2 (4%)              |       |
|                                                                       | No prior discussion (skipped) | 93 (54%)            | 74 (60%)            | 19 (40%)            |       |
| Pre-treatment education class                                         | Attended                      | 23 (14%)            | 8 (7%)              | 15 (32%)            | <.001 |
|                                                                       | Not attended                  | 147 (86%)           | 115 (93%)           | 32 (68%)            |       |
| CKD knowledge                                                         | Median (IQR)                  | 5.0 (4.0, 7.0)      | 5.0 (4.0, 6.0)      | 6.0 (5.0, 7.0)      | .02   |
| <b>Psychosocial</b>                                                   |                               |                     |                     |                     |       |
| Depression                                                            | Depressed                     | 35 (21%)            | 26 (21%)            | 9 (19%)             | .79   |
|                                                                       | Not Depressed                 | 135 (79%)           | 97 (78%)            | 38 (81%)            |       |
| Treatment decision self-efficacy                                      | Median (IQR)                  | 90.9 (77.3, 100.0)  | 86.4 (72.7, 100.0)  | 90.9 (90.9, 100.0)  | <.001 |
| Kidney self-management self-efficacy                                  | Median (IQR)                  | 29.0 (25.0, 33.0)   | 27.7 (24.0, 33.0)   | 32.0 (25.0, 36.0)   | .08   |
| Informational support                                                 | Median (IQR)                  | 57.7 (45.4, 65.6)   | 56.6 (44.7, 65.6)   | 60.5 (49.7, 65.6)   | .05   |
| Emotional support                                                     | Median (IQR)                  | 62.0 (48.7, 62.0)   | 55.7 (47.1, 62.0)   | 62.0 (48.9, 62.0)   | .06   |
| Instrumental support                                                  | Median (IQR)                  | 62.8 (50.4, 63.3)   | 56.8 (50.4, 63.3)   | 63.3 (52.3, 63.3)   | .23   |

*Note.* SURE = Sure of myself, Understand information, Risk-benefit ratio, Encouragement; eGFR = estimated glomerular filtration rate; CKD = chronic kidney disease. Medians (IQR) or frequencies are shown. We assessed participant differences in decisional conflict prevalence using Mann-Whitney tests for continuous variables and chi-squared or Fisher's exact tests for categorical variables. Frequencies may not total 100% due to missing data. Highest-risk participants had an estimated glomerular filtration rate of < 30 or a 2-year Kidney Failure Risk Equation score of  $\geq$  10%.

**Table S3. Unadjusted and adjusted associations of highest-risk participant' characteristics with SURE screening test results indicative of decisional conflict about kidney failure treatment modalities**

| <b>Characteristics</b>                | <b>Model 1</b>     | <b>p</b> | <b>Model 2</b>     | <b>p</b> |
|---------------------------------------|--------------------|----------|--------------------|----------|
| <b>Sociodemographic</b>               |                    |          |                    |          |
| Age                                   | 1.03 (1.00 - 1.05) | .03      | .97 (.92 - 1.03)   | .33      |
| Sex                                   |                    |          |                    |          |
| Male                                  | Ref                |          | Ref                |          |
| Female                                | 1.23 (.62 - 2.46)  | .55      | 1.39 (.50 - 3.88)  | .53      |
| Race                                  |                    |          |                    |          |
| Other race/ethnicity                  | Ref                |          | Ref                |          |
| Non-Hispanic White                    | 1.33 (.24 - 7.53)  | .74      | .26 (.02 - 3.98)   | .33      |
| Marital Status                        |                    |          |                    |          |
| Never Married/Living with partner     | Ref                |          | Ref                |          |
| Married/Living with partner           | 1.25 (.64 - 2.45)  | .51      | 1.24 (.43 - 3.62)  | .69      |
| Education                             |                    |          |                    |          |
| Less than high school                 | Ref                |          | Ref                |          |
| High school graduate/GED/Some college | .67 (.25 - 1.80)   | .42      | .49 (.11 - 2.11)   | .33      |
| College graduate or more              | 1.02 (.30 - 3.51)  | .97      | 1.32 (.22 - 7.76)  | .76      |
| Employment                            |                    |          |                    |          |
| Employed/Looking for work             | Ref                |          | Ref                |          |
| Retired                               | 1.95 (.86 - 4.41)  | .11      | 3.49 (.73 - 16.61) | .12      |
| Retired due to disability             | 1.14 (.34 - 3.81)  | .84      | 1.93 (.26 - 14.40) | .52      |
| Annual Household Income               |                    |          |                    |          |
| Under \$30,000                        | Ref                |          | Ref                |          |
| \$30,000 to \$59,999                  | .88 (.35 - 2.19)   | .78      | .97 (.25 - 3.81)   | .97      |
| \$60,000 and above                    | .87 (.33 - 2.31)   | .78      | 1.12 (.19 - 6.50)  | .90      |
| Insurance                             |                    |          |                    |          |
| Commercial                            | Ref                |          | Ref                |          |
| Government/Other                      | .26 (.02 - 3.18)   | .29      | .74 (.02 - 23.76)  | .87      |
| Medicaid                              | .37 (.10 - 1.43)   | .15      | .38 (.04 - 3.94)   | .41      |
| Medicare                              | 1.91 (.84 - 4.34)  | .12      | 2.73 (.72 - 10.32) | .14      |
| Health Literacy                       |                    |          |                    |          |
| Inadequate/Marginal                   | Ref                |          | Ref                |          |
| Adequate                              | 1.01 (.50 - 2.05)  | .98      | 1.50 (.50 - 4.48)  | .47      |
| <b>Physical health</b>                |                    |          |                    |          |
| Charlson Comorbidity Index            | 1.04 (.89 - 1.20)  | .63      | .95 (.78 - 1.16)   | .62      |
| <b>CKD stage</b>                      |                    |          |                    |          |
| <b>Stages 2, 3a, and 3b (30 - 60)</b> | Ref                |          | Ref                |          |

|                                                                    |                   |       |                    |     |
|--------------------------------------------------------------------|-------------------|-------|--------------------|-----|
| Stage 4 (15 – 29)                                                  | .46 (.05 - 3.93)  | .48   | .31 (.02 - 5.30)   | .42 |
| Stage 5 (< 15)                                                     | .22 (.02 - 2.37)  | .21   | .19 (.01 - 4.86)   | .32 |
| <b>Nephrology care/knowledge</b>                                   |                   |       |                    |     |
| Years in nephrology care                                           | .91 (.84 - .99)   | .04   | .93 (.82 - 1.06)   | .27 |
| Patient-centeredness                                               | .38 (.17 - .85)   | .02   | .48 (.15 - 1.55)   | .22 |
| Kidney doctor recommended specific treatment option                |                   |       |                    |     |
| No                                                                 | Ref               |       | Ref                |     |
| Yes                                                                | .20 (.07 - .56)   | .002  | .26 (.07 - 1.04)   | .06 |
| Satisfied with patient-kidney team discussion of treatment options |                   |       |                    |     |
| Not at all/A little                                                | Ref               |       | Ref                |     |
| Mostly                                                             | .64 (.10 - 4.14)  | .64   | 1.19 (.09 - 15.30) | .89 |
| Completely                                                         | .20 (.04 - 1.00)  | .05   | .24 (.03 - 2.18)   | .20 |
| Kidney failure treatment modality education class                  |                   |       |                    |     |
| Not attended                                                       | Ref               |       | Ref                |     |
| Attended                                                           | .15 (.06 - .38)   | <.001 | .26 (.07 - .96)    | .04 |
| CKD knowledge                                                      | .77 (.63 - .95)   | .02   | .87 (.62 - 1.22)   | .41 |
| <b>Psychosocial</b>                                                |                   |       |                    |     |
| Depressive symptoms                                                |                   |       |                    |     |
| Mild or no symptoms                                                | Ref               |       | Ref                |     |
| At least moderate symptoms                                         | 1.13 (.49 - 2.64) | .77   | .59 (.15 - 2.29)   | .45 |
| Decision self-efficacy                                             | .95 (.92 - .98)   | .001  | .95 (.91 - .99)    | .03 |
| Kidney self-management self-efficacy                               | .96 (.90 - 1.01)  | .12   | 1.00 (.92 - 1.09)  | .96 |
| Informational support                                              | .98 (.95 - 1.01)  | .13   | .98 (.91 - 1.05)   | .50 |
| Emotional support                                                  | .98 (.94 - 1.01)  | .16   | 1.02 (.94 - 1.11)  | .63 |
| Instrumental support                                               | .99 (.96 - 1.02)  | .41   | 1.00 (.93 - 1.07)  | .90 |

Note. SURE = Sure of myself, Understand information, Risk-benefit ratio, Encouragement; eGFR = estimated glomerular filtration rate; CKD = chronic kidney disease. Odds ratios and corresponding 95% confidence intervals are presented. Only one indicator of kidney function (i.e., eGFR) was included given the high correlation among all indicators (i.e., eGFR, Kidney Failure Risk Equation (KFRE) score, and albumin-to-creatinine (ACR) ratio).
